# Supplementary material for: Multi-species transcriptome meta-analysis of the response to retinoic acid in vertebrates and comparative analysis of the effects of retinol and retinoic acid on gene expression in LMH cells
Source: PubMed Central journal article supplement (PMC7923837; doi:10.1186/s12864-021-07451-2), 2021-03-02

Additional file 3: Venn diagram of differentially expressed genes in chicken hepatocellular carcinoma (LMH) cells, human neuroblastoma cells (SH-SY5Y), murine embryonic stem cells (mESCs), murine lymphoblasts (mLympho), and in vitro-generated pancreatic explants from *Xenopus laevis* (Xenopus) after exposure retinoic acid.

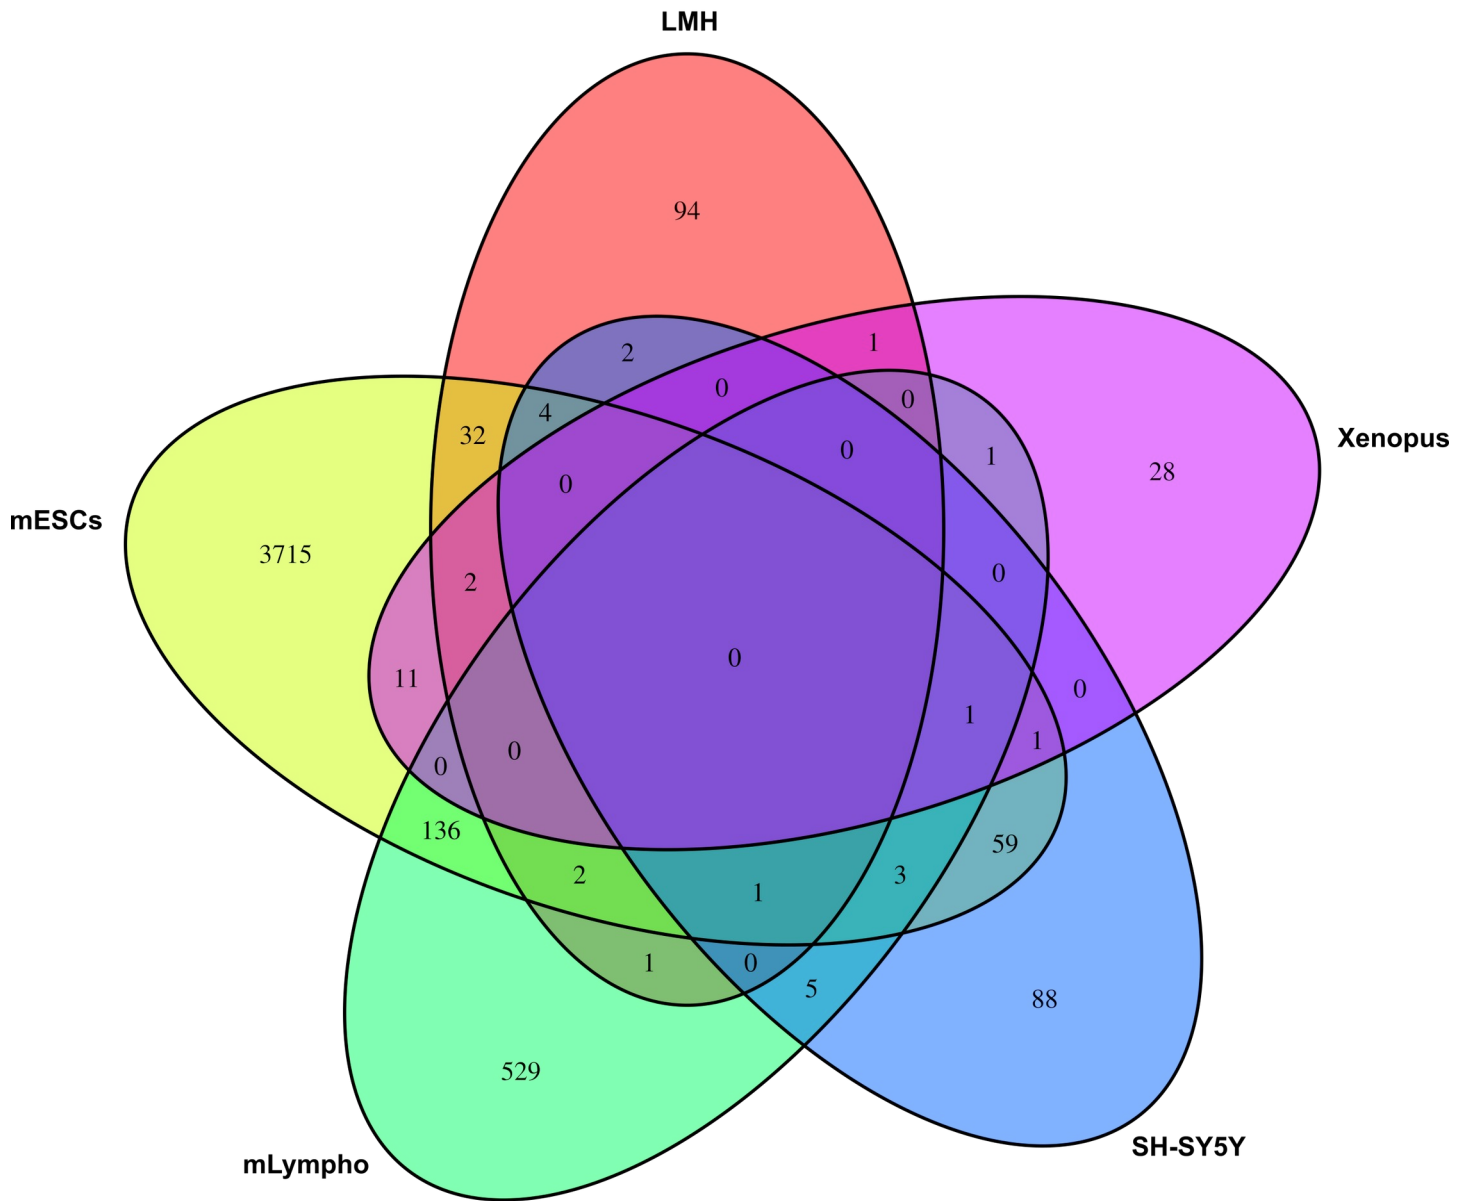

Supplement: 12864_2021_7451_MOESM3_ESM.pdf [file 12864_2021_7451_MOESM3_ESM.pdf]
